# Supplementary material for: Localization and orientation of heavy-atom cluster compounds in protein crystals using molecular replacement
Source: PubMed Central journal article supplement (PMC3565441; doi:10.1107/s0907444912046008), 2013-01-19
Supplement: d-69-00284-sup1.pdf [file d-69-00284-sup1.pdf]

## Supplementary Material

R-factors calculated between native and derivative DR6 data sets:

| R-factor between data sets (calculated in SCALEIT): |                      |                     |                                    |                       |
|-----------------------------------------------------|----------------------|---------------------|------------------------------------|-----------------------|
| Resolution (Å)                                      | Native/<br>HMT-SIRAS | Native/<br>MAD-peak | Native/<br>MAD-inflection<br>point | Native/<br>MAD-remote |
| 18.0                                                | 0.692                | 0.632               | 0.514                              | 0.659                 |
| 10.4                                                | 0.735                | 0.658               | 0.460                              | 0.693                 |
| 8.0                                                 | 0.411                | 0.352               | 0.314                              | 0.369                 |
| 6.8                                                 | 0.292                | 0.243               | 0.212                              | 0.260                 |
| 6.0                                                 | 0.278                | 0.251               | 0.224                              | 0.271                 |
| 5.4                                                 | 0.272                | 0.239               | 0.225                              | 0.259                 |
| 5.0                                                 | 0.271                | 0.234               | 0.215                              | 0.249                 |
| 4.6                                                 | 0.266                | 0.232               | 0.218                              | 0.249                 |
| 4.4                                                 | 0.237                | 0.212               | 0.209                              | 0.228                 |
| 4.1                                                 | 0.226                | 0.213               | 0.207                              | 0.221                 |
| 3.9                                                 | 0.230                | 0.213               | 0.213                              | 0.226                 |
| 3.7                                                 | 0.224                | 0.219               | 0.217                              | 0.228                 |
| 3.6                                                 | 0.229                | 0.224               | 0.224                              | 0.233                 |
| 3.5                                                 | 0.253                | 0.242               | 0.238                              | 0.250                 |
| 3.3                                                 | 0.274                | 0.251               | 0.242                              | 0.247                 |
| Overall:                                            | 0.285                | 0.259               | 0.237                              | 0.272                 |

| R-factor between data sets(calculated in SCALEIT): |                        |                                       |                          |
|----------------------------------------------------|------------------------|---------------------------------------|--------------------------|
| Resolution (Å)                                     | HMT-SIRAS/<br>MAD-peak | HMT-SIRAS/<br>MAD-inflection<br>point | HMT-SIRAS/<br>HMT-remote |
| 18.0                                               | 0.050                  | 0.125                                 | 0.039                    |
| 10.4                                               | 0.067                  | 0.137                                 | 0.040                    |
| 8.0                                                | 0.088                  | 0.152                                 | 0.078                    |
| 6.8                                                | 0.103                  | 0.185                                 | 0.094                    |
| 6.0                                                | 0.093                  | 0.141                                 | 0.089                    |
| 5.4                                                | 0.097                  | 0.141                                 | 0.098                    |
| 5.0                                                | 0.083                  | 0.121                                 | 0.082                    |
| 4.6                                                | 0.082                  | 0.111                                 | 0.072                    |
| 4.4                                                | 0.073                  | 0.096                                 | 0.073                    |
| 4.1                                                | 0.072                  | 0.092                                 | 0.074                    |
| 3.9                                                | 0.066                  | 0.083                                 | 0.069                    |
| 3.7                                                | 0.081                  | 0.094                                 | 0.086                    |
| 3.6                                                | 0.089                  | 0.109                                 | 0.092                    |
| 3.5                                                | 0.099                  | 0.117                                 | 0.099                    |
| 3.3                                                | 0.124                  | 0.149                                 | 0.123                    |
| 3.2                                                | 0.144                  | 0.180                                 | 0.140                    |
| 3.1                                                | 0.153                  | 0.190                                 | 0.146                    |
| 3.0                                                | 0.158                  | 0.201                                 | 0.150                    |
| Overall:                                           | 0.099                  | 0.132                                 | 0.096                    |

| Resolution (Å) | R-factor between data sets(calculated in SCALEIT): |                         |                                        |
|----------------|----------------------------------------------------|-------------------------|----------------------------------------|
|                | MAD-peak/<br>MAD-inflection<br>point               | MAD-peak/<br>MAD-remote | MAD-inflection<br>point/<br>MAD-remote |
| 18.0           | 0.081                                              | 0.042                   | 0.134                                  |
| 10.4           | 0.08                                               | 0.042                   | 0.108                                  |
| 8.0            | 0.058                                              | 0.04                    | 0.08                                   |
| 6.8            | 0.062                                              | 0.051                   | 0.082                                  |
| 6.0            | 0.056                                              | 0.06                    | 0.085                                  |
| 5.4            | 0.059                                              | 0.054                   | 0.079                                  |
| 5.0            | 0.053                                              | 0.045                   | 0.068                                  |
| 4.6            | 0.043                                              | 0.046                   | 0.066                                  |
| 4.4            | 0.039                                              | 0.042                   | 0.055                                  |
| 4.1            | 0.04                                               | 0.045                   | 0.055                                  |
| 3.9            | 0.037                                              | 0.043                   | 0.053                                  |
| 3.7            | 0.046                                              | 0.055                   | 0.056                                  |
| 3.6            | 0.052                                              | 0.06                    | 0.069                                  |
| 3.5            | 0.063                                              | 0.074                   | 0.081                                  |
| 3.3            | 0.079                                              | 0.082                   | 0.098                                  |
| 3.2            | 0.093                                              | 0.11                    | 0.121                                  |
| 3.1            | 0.106                                              | 0.116                   | 0.136                                  |
| 3.0            | 0.117                                              | 0.13                    | 0.161                                  |
| 2.9            | 0.139                                              | 0.138                   | 0.175                                  |
| Overall:       | 0.065                                              | 0.066                   | 0.087                                  |
